# Supplementary material for: Cigarette smoke promotes colorectal cancer through modulation of gut microbiota and related metabolites
Source: HighWire-hosted journal article supplement (doi:10.1136/gutjnl-2021-325021), 2022-04-06
Supplement: gutjnl-2021-325021supp003_data_supplement.pdf [file gutjnl-2021-325021supp003_data_supplement.pdf]

## Supplementary Figure 2

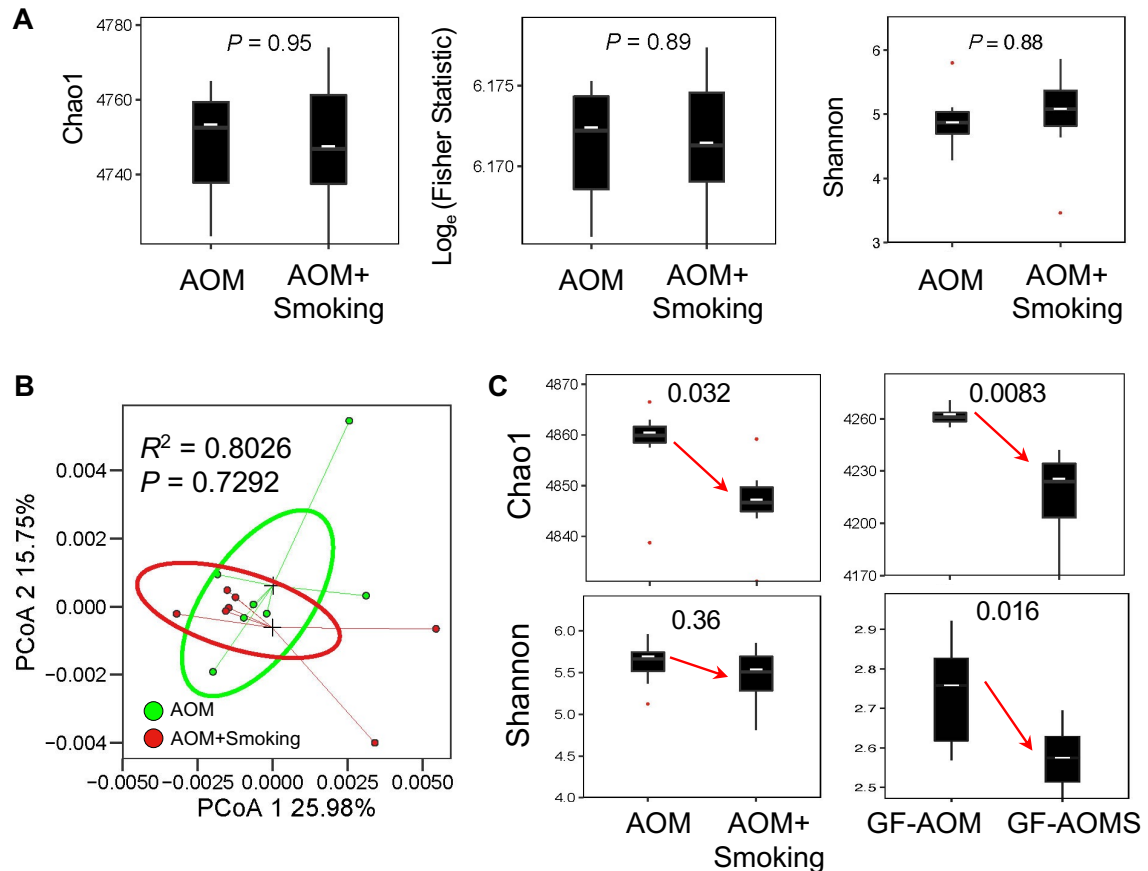

**Supplementary Figure 2.** (A) Alpha and beta (B) diversity of baseline microbiota in smoking and non-smoking group, before any treatment. (C) Alpha diversity (Chao1 and Shannon) of gut microbiota at end time point.
