# Supplementary material for: Cigarette smoke promotes colorectal cancer through modulation of gut microbiota and related metabolites
Source: HighWire-hosted journal article supplement (doi:10.1136/gutjnl-2021-325021), 2022-04-06
Supplement: gutjnl-2021-325021supp006_data_supplement.pdf [file gutjnl-2021-325021supp006_data_supplement.pdf]

## Supplementary Figure 4

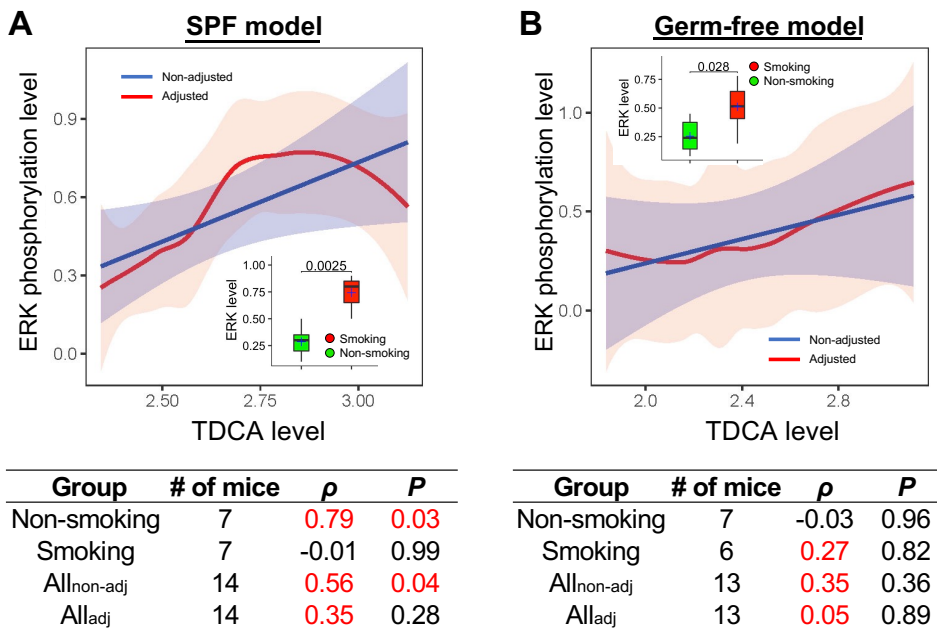

**Supplementary Figure 4.** Correlation analysis between *ERK* phosphorylation and TDCa. The result showed positive correlation between *ERK* phosphorylation level and TDCa level in both SPF mice (AOM plus AOM+smoking group) (A) and germ-free mice (GF-AOM plus GF-AOMS group) (B). Pearson correlation was used to calculate the non-adjusted correlation. Partial's Spearman correlation was used to adjust the correlation by controlling the smoking parameter.
