# Supplementary material for: Cigarette smoke promotes colorectal cancer through modulation of gut microbiota and related metabolites
Source: HighWire-hosted journal article supplement (doi:10.1136/gutjnl-2021-325021), 2022-04-06
Supplement: gutjnl-2021-325021supp007_data_supplement.pdf [file gutjnl-2021-325021supp007_data_supplement.pdf]

## Supplementary Figure 5

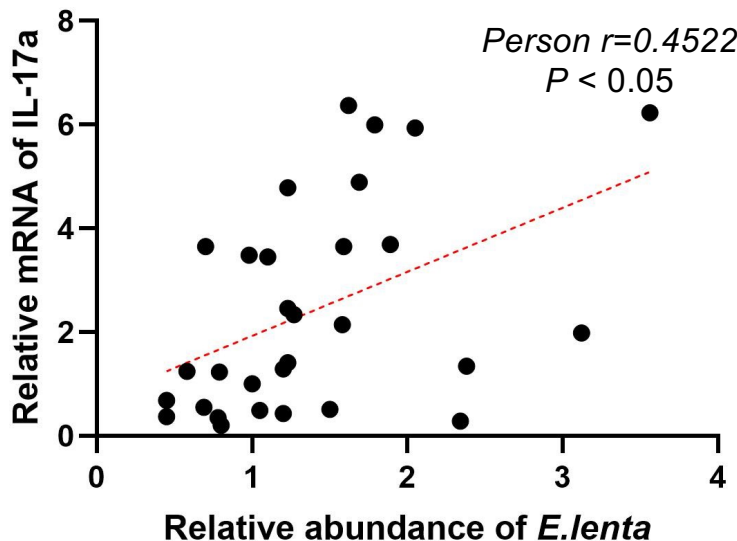

**Supplementary Figure 5.** The correlation between abundance of *E. lenta* and the relative mRNA expression of IL-17a in mice model in SPF environments.
