# Supplementary material for: Cigarette smoke promotes colorectal cancer through modulation of gut microbiota and related metabolites
Source: HighWire-hosted journal article supplement (doi:10.1136/gutjnl-2021-325021), 2022-04-06
Supplement: gutjnl-2021-325021supp009_data_supplement.pdf [file gutjnl-2021-325021supp009_data_supplement.pdf]

## Supplementary Figure 7 Microbiota dysbiosis/altered metabolites

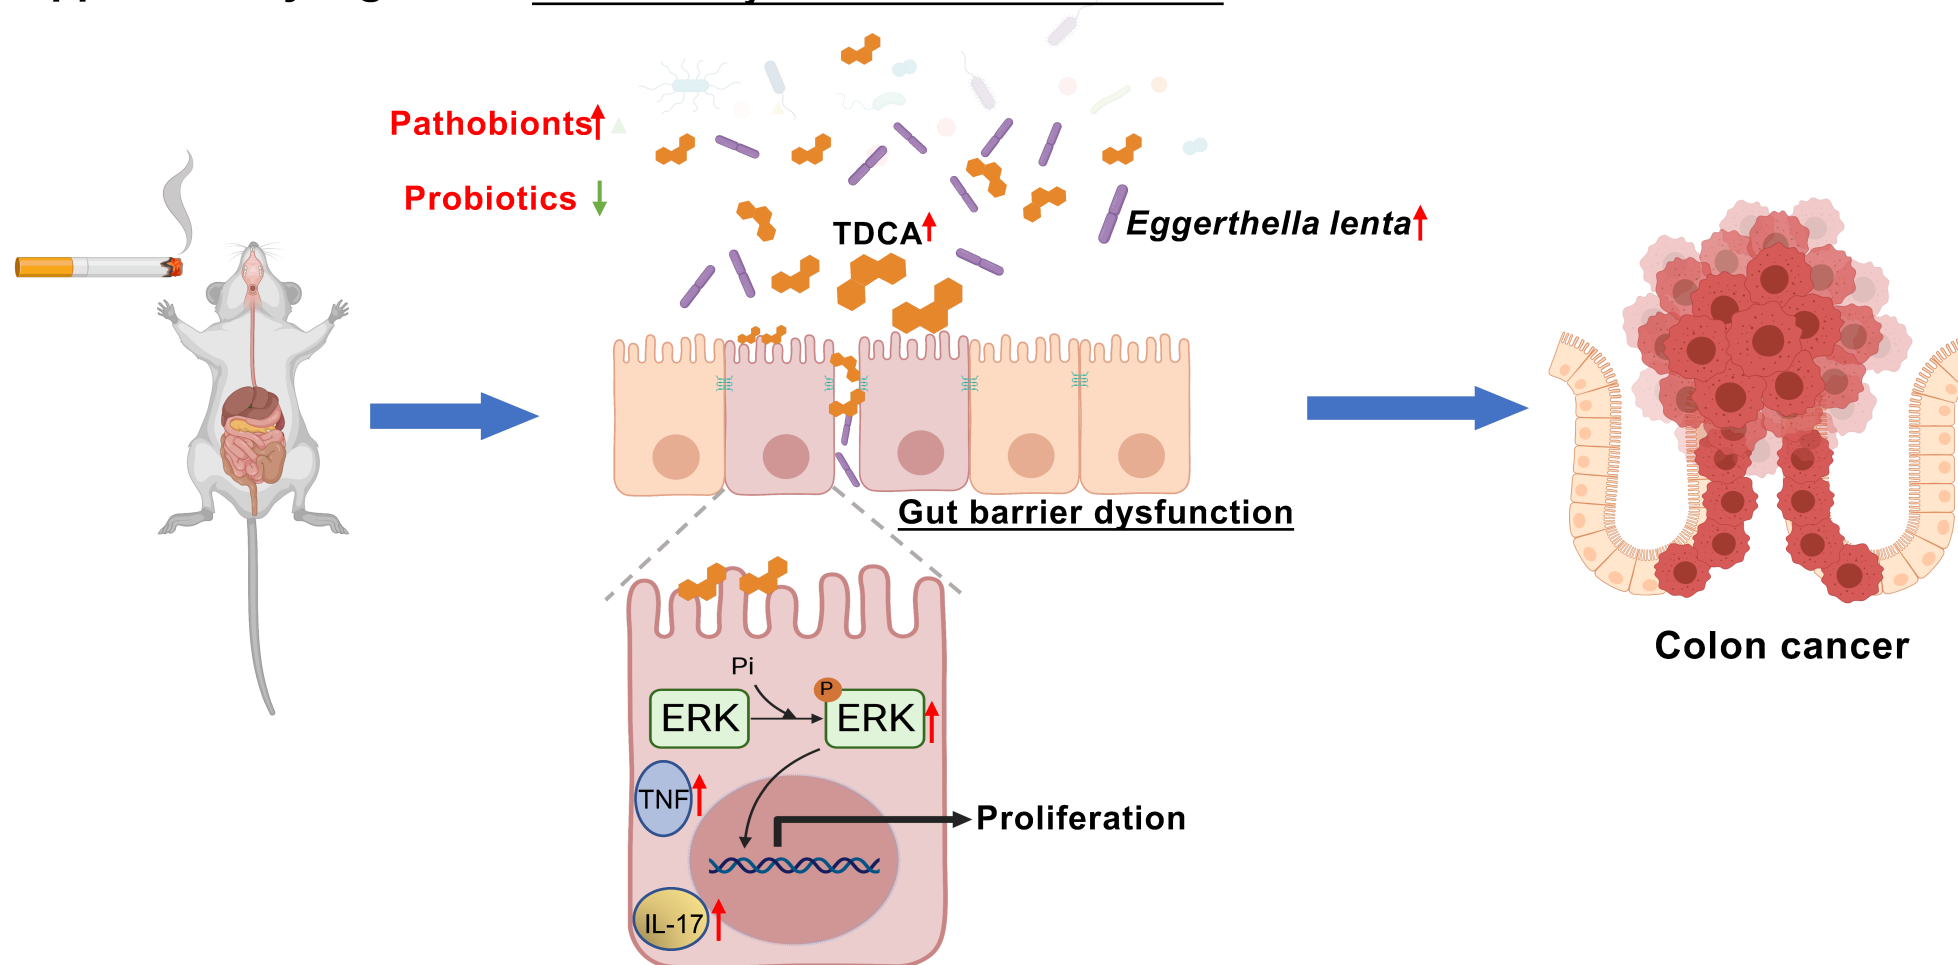

**Supplementary figure 7. Cigarette smoke promotes colon tumorigenesis by inducing gut microbiota dysbiosis and changed metabolites.** Cigarette smoke induced gut microbiota dysbiosis and altered metabolites (eg. induced taurodeoxycholic acid (TDCA)), which activated oncogenic MAPK/ERK signaling and pro-inflammatory (IL-17 and TNF) signalling pathways in colonic epithelium. Moreover, gut barrier dysfunction caused by gut microbiota dysbiosis might facilitate the TDCA to activate the MAPK/ERK signaling pathway. (Created with BioRender.com.)
